# Supplementary material
Source: Springer Nature journal article supplement (https://www.springermedizin.de/resource/supplementary/13756_2013_569_MOESM1_ESM.pdf/9682356)

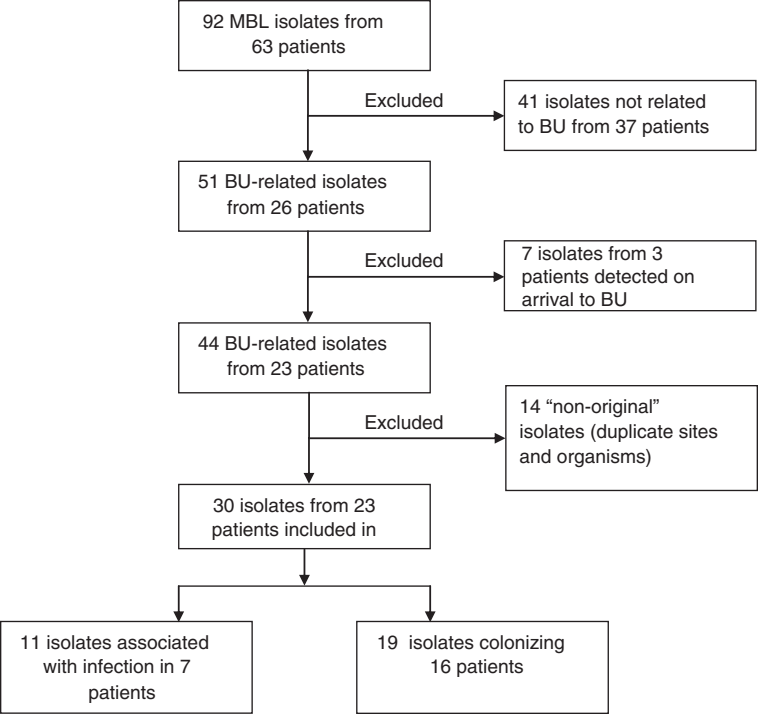

Supplement: MOESM1 [file 9682356]
